# Supplementary material for: Artificial intelligence in peer review: How can evolutionary computation support journal editors?
Source: PLOS journal article supplement (doi:10.1371/journal.pone.0184711), 2017-09-20
Supplement: S3 (10.1371/journal.pone.0184711.s003) [file journal.pone.0184711.s003]

**Algorithm S1a:** The algorithm which evaluates the fitness of editorial strategies.

```

Function fitness(editorialStrategy: editorial strategy, minBatch: integer, maxBatch: integer,
minEffective: integer, maxEffective: integer, plannedSimulationRuns: integer, criticalFitness: integer):
  points  $\leftarrow$  {}; // initialise empty list of Point objects
  criticalErrors  $\leftarrow$  0;
  foreach batchSize between minBatch and maxBatch do
    point  $\leftarrow$  (0,0); // initialise Point point to (x = 0, y = 0)
    simulationRuns  $\leftarrow$  0;
    repeat
      simulationRuns  $\leftarrow$  simulationRuns + 1;
      elapsedDays,effectiveReviewers,criticalError  $\leftarrow$  simulation(batchSize, editorialStrategy);
      if criticalError = true then
        criticalErrors  $\leftarrow$  criticalErrors + 1;
        break
      else
        point.x  $\leftarrow$  point.x + effectiveReviewers;
        point.y  $\leftarrow$  point.y + elapsedDays;
      end
    until simulationRuns < plannedSimulationRuns;
    point.x  $\leftarrow$  point.x/simulationRuns; // averaging
    point.y  $\leftarrow$  point.y/simulationRuns;
    points  $\leftarrow$  points  $\cup$  {point};
  end
  if criticalErrors > 0 then
    return criticalErrors * criticalFitness; // penalty for errors in strategy
  else
    return the area under the curve defined by points (points are interpolated by lines; area is
    calculated for  $x \in [\text{minEffective}, \text{maxEffective}]$ ; if the range of points is smaller, it is assumed
    that the  $y$  value of the missing points is equal to the  $y$  value of the nearest point in points);
  end
end

```

**Algorithm S1b:** The algorithm used to simulate the review process.

```

structure ReviewThread{
  integer duration; // duration, in days, of this review thread
  boolean hasReview; // indicates whether a review was received during the execution of this
  thread
  integer offset  $\leftarrow$  elapsedDays; // number of days after which the thread was started
};
Function simulation(batchSize: integer, editorialStrategy: editorial strategy):
   $\mathbb{T} \leftarrow$  { ReviewThread  $t_i \mid i = 1, 2, \dots, \text{batchSize}$  }; // generate initial review threads
  threadsNumber  $\leftarrow$  batchSize; // initial number of threads
  receivedReviews  $\leftarrow$  0;
  elapsedDays  $\leftarrow$  0;
  effectiveReviewers  $\leftarrow$  batchSize; // initial number of reviewers
  while receivedReviews < 2 do
    elapsedDays  $\leftarrow$   $\min\{t_i.\text{offset} + t_i.\text{duration} : t_i \in \mathbb{T}\}$ ; // find the smallest number of days after
    which at least one of the review threads ended
    foreach ( $t_i \in \mathbb{T} \mid t_i.\text{offset} + t_i.\text{duration} = \text{elapsedDays}$ ) do
      if  $t_i.\text{hasReview} = \text{true}$  then
        receivedReviews  $\leftarrow$  receivedReviews + 1
      end
       $\mathbb{T} \leftarrow \mathbb{T} \setminus t_i$ ; // remove the finished thread from the list of threads
      threadsNumber  $\leftarrow$  threadsNumber - 1;
    end
    if receivedReviews < 2 then
      newThreadsNumber  $\leftarrow$  editorialStrategy(state parameters); // the strategy proposes a
      number of new threads that should be started based on available information
      if newThreadsNumber < 0 or
      newThreadsNumber + threadsNumber > batchSize or
      (threadsNumber = 0 and newThreadsNumber = 0) then
        return (criticalError  $\leftarrow$  true);
      else
         $\mathbb{T} \leftarrow \mathbb{T} \cup$  { ReviewThread  $t_i \mid i = 1, 2, \dots, \text{newThreadsNumber}$  }; // create new review
        threads
        effectiveReviewers  $\leftarrow$  effectiveReviewers + newThreadsNumber;
        threadsNumber  $\leftarrow$  threadsNumber + newThreadsNumber;
      end
    end
  end
  return elapsedDays and effectiveReviewers;
end

```
